# Supplementary material for: Exploring the therapeutic potential of modern and ancestral phenylalanine/tyrosine ammonia-lyases as supplementary treatment of hereditary tyrosinemia
Source: PubMed Central journal article supplement (PMC6987202; doi:10.1038/s41598-020-57913-y), 2020-01-28
Supplement: 41598_2020_57913_MOESM1_ESM.pdf [file 41598_2020_57913_MOESM1_ESM.pdf]

## SUPPLEMENTARY INFORMATION

### Exploring the therapeutic potential of modern and ancestral phenylalanine/tyrosine ammonia-lyases as supplementary treatment of hereditary tyrosinemia

Natalie M. Hendrikse<sup>1,2,3</sup>, Albin Holmberg Larsson<sup>1,2</sup>, Stefan Svensson Gelius<sup>1</sup>, Sergei Kuprin<sup>1</sup>, Erik Nordling<sup>1</sup> & Per-Olof Syrén<sup>2,3,4\*</sup>

<sup>1</sup> Swedish Orphan Biovitrum AB, SE-112 76 Stockholm, Sweden.

<sup>2</sup> School of Engineering Sciences in Chemistry, Biotechnology and Health, KTH Royal Institute of Technology, Science for Life Laboratory, Tomtebodavägen 23, Box 1031, SE-171 21 Solna, Stockholm, Sweden.

<sup>3</sup> School of Engineering Sciences in Chemistry, Biotechnology and Health, Department of Fibre and Polymer Technology, KTH Royal Institute of Technology, Teknikringen 56-58, SE-100 44 Stockholm, Sweden.

<sup>4</sup> School of Engineering Sciences in Chemistry, Biotechnology and Health, Division of Protein Technology, KTH Royal Institute of Technology, Science for Life Laboratory, Tomtebodavägen 23, Box 1031, SE-171 21 Solna, Stockholm, Sweden.

\* Corresponding author:

Per-Olof Syrén

[per-olof.syren@biotech.kth.se](mailto:per-olof.syren@biotech.kth.se)

Phone: +46-8-7906508

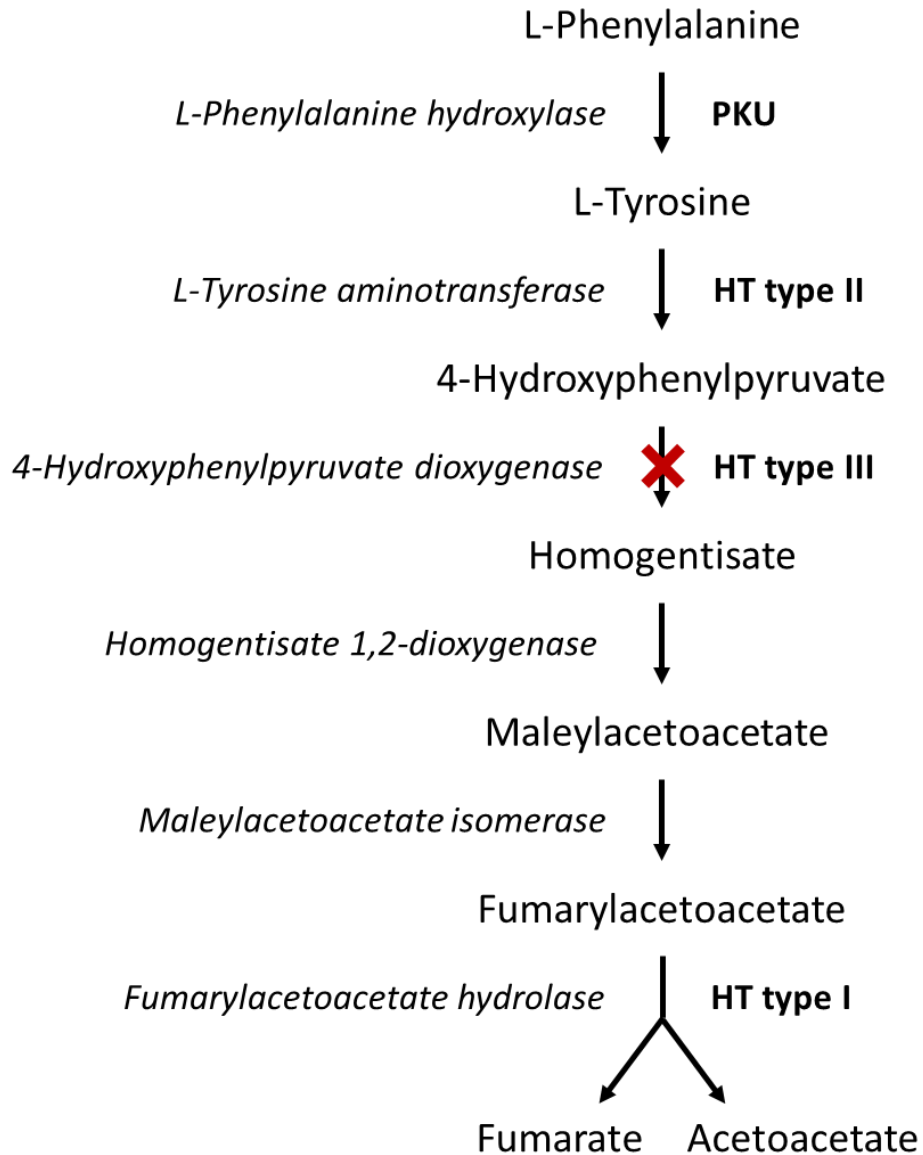

**Supplementary Figure S1: L-Phenylalanine and L-Tyrosine catabolism.** The enzyme responsible for each step (indicated by an arrow) is shown in italics on the left and the corresponding inborn error of metabolism is shown in bold on the right. The step blocked by Nitisinone is indicated by a red cross<sup>1</sup>.

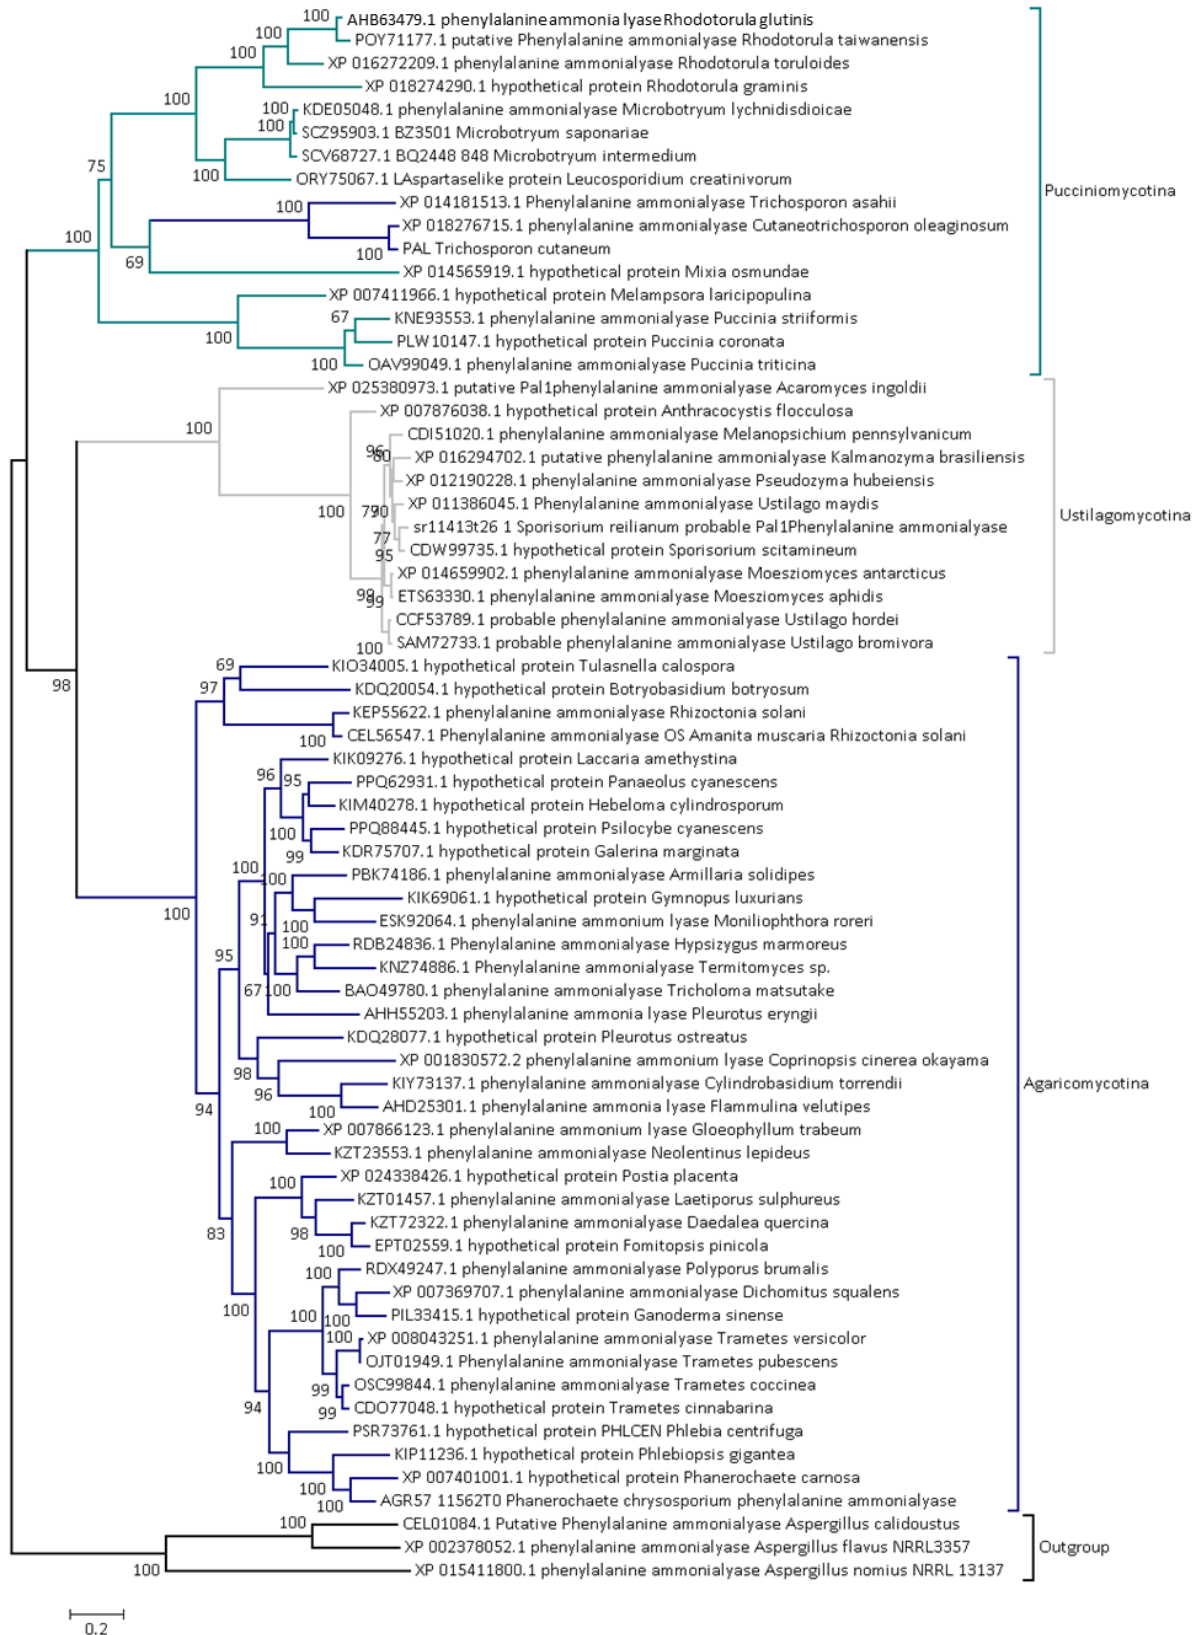

**Supplementary Figure S2: Phylogenetic tree of PAL/TAL from fungi.** The top part in colour consist of sequences from Basidiomycota and the bottom part in black consists of sequences from Ascomycota, which were used as outgroup to root the tree. Branches within the Basidiomycota are coloured according to subdivision: Agaricomycotina (blue), Ustilagomycotina (grey) and Pucciniomycotina (green). Bootstrap values shown are based on 1000 replicates.

RgPAL MAPSVDSIATSVANSLSNGL----HAAAAANGGDVHKKTAGAGSLLPTTE  
 MEGA\_A1 MAPSLDSISHSFANGVPNGF----HAKQAANGASTHKKTAVAGSHLPTTE  
 MEGA\_A3 MAPSADSFTHSLTNPVPNWFGHTPRAAAAANGP--KKTPLSPSLGPTTL  
 PAML\_A1 MAPSLDSIAHSLANSVSSGAGHL-NAAAAANGA--SKPTALSGLLLPTTE  
 PAML\_A2 MAPSLDSFADSLTHSVPSFAGHL-NATAAANGP--HKPTALSGLLGPTTE  
 PAML\_A3 MAPSADSFPSDLTHSVPSFAGHL-NAAAAASGP--SPSRELSGLLAPTTL  
 PAML\_A4 MAPSADSFPSDLTHGVPSFAGHR-SAAAAANGP--ASSREMSGLLARTTL  
 \*\*\*\* \*: . \* . : : . . \* \*\* . \* :

RgPAL TTQLDIVERILADAGATDQIKLDGYTLTLGDVVGAARRGRSVKVDSPHI  
 MEGA\_A1 TTQVDIVEKMLADAPTTDTIELDGYSLTLGDVVSAARKRGPVKVKDSDPI  
 MEGA\_A3 TDQVDLLERMSADATNADTIKLDGYSLTLGDVVAAARKGAKVKIDDDPEI  
 PAML\_A1 TTQVDIVERILADASTTDTIELDGYSLTLGDVVSAARKGRSVKVKDSDPI  
 PAML\_A2 TTQVDIVERIAADATTADTIELDGYSLTLGDVVSAARKGRKVKIKDDPDI  
 PAML\_A3 TSQVDLLERLAADATSADTIKLDGYSLTLGDVVAAARKGAKVKIDDDPAI  
 PAML\_A4 TSKVEALERLASDATNSKTI TLDGHSALTVDVVAAARYGAKVKIDDDPAI  
 \* : : : \* : : : \* \* : . \* \* \* : : \* \* \* : \* \* \* : \* \* \* : \* \* \*

RgPAL REKIDASVEFLRTQLD-NSVYGVTTGFGGSADTRTEDAISLQKALLEHQL  
 MEGA\_A1 REKIDKSVEFLRSQLD-NSVYGVTTGFGGSADTRTEDAISLQKALLEHQL  
 MEGA\_A3 KKRIDESVEFLKSKLD-NSVYGVTTGFGGSADTRTQDPLALQIALLEHQL  
 PAML\_A1 REKIDKSVEFLRSQLDGNVYGVTTGFGGSADTRTEDAISLQKALLEHQL  
 PAML\_A2 RERIDESVEFLRSQLDGNVYGVTTGFGGSADTRTEDAISLQKALLEHQL  
 PAML\_A3 RKRIDESVEFLKSKLNGNSVYGVTTGFGGSADTRTEDPLALQIALLEHQL  
 PAML\_A4 RKRIEESVEFLESKLNGETSIYGVTTGFGGSADTRTNDPAALQIALLEHQL  
 : : : \* : \* \* \* : : : \* : \* \* \* \* \* \* \* \* \* \* \* \* : \* \* \* \* \* \* \*

RgPAL CGVLPTSMDGFALGRGLENLPLEVVRGAMTIRVNSLTRGHSAVRIVVLE  
 MEGA\_A1 CGVLPTSFDLDFSLGRGLENLPLEVVRGAMTIRVNSLTRGHSAVRLVVLE  
 MEGA\_A3 CGVLPTSFDLDFALGRGLENAMPLEVVRGAMLIRVNSLTRGHSAVRILEVLE  
 PAML\_A1 CGVLPTPLASFLGRGLENLPLEVVRGAMTIRVNSLTRGHSAVRLVVLE  
 PAML\_A2 CGVLPTPLASFLGRGLENAMPLEVVRGAMLIRVNSLTRGHSAVRLVVLE  
 PAML\_A3 CGVLPTSSSFLSFLGRGLENAMPLEVVRGAMLIRVNSLTRGHSAVRILEVLE  
 PAML\_A4 CGVLPTSSSAFLSDPLSNAMPEPIVRGAMLIRVNSLVRGHSAVRILEVLE  
 \* \* \* \* \* . \* : \* . \* . \* : \* : \* \* \* \* \* \* \* \* \* \* \* : \* \* \*

RgPAL ALTNFLNHGITPIVPLRGTISASGDLSPLSYIAASITGHPDSKVHV--DG  
 MEGA\_A1 ALTNFLNHGITPIVPLRGTISASGDLSPLSYIAAAITGHPDSKVHVVEG  
 MEGA\_A3 TLVKFLNHGITPIVPLRGSISASGDLSPLSYIAGAITGHPDIKVFTCIDG  
 PAML\_A1 ALTNFLNHGITPIVPLRGTISASGDLSPLSYIAAAITGHPDSKVHVVEG  
 PAML\_A2 ALVNFLNHGITPIVPLRGSISASGDLSPLSYIAAAITGHPDSKVHVVDG  
 PAML\_A3 TLVNFLNHGITPVVPLRGSISASGDLSPLSYIAGAITGHPDIKVFVVDGL  
 PAML\_A4 TLVNFLNHGITPVVPLRGSISASGDLSPLSYIAGAITGHPDIRVFDVGL  
 : \* : \* \* \* \* \* : \* \* \* \* : \* \* \* \* \* \* \* \* \* \* \* : \* \* \* \* : \* . .

RgPAL --KIMSAQEAIALKGLQPVVLPKEGLGLVNGTAVSASMATLALTDHVL  
 MEGA\_A1 KEKIMSAREAMALYGLEPVVLPKEGLGLVNGTAVSASMATLALHDAHML  
 MEGA\_A3 KEEIMPAPKALKHGIEPVVLPKEGLGLVNGTAVSASMATLALHDSHML  
 PAML\_A1 KEKIMSAREALALYGLEPVVLPKEGLGLVNGTAVSASMATLALHDAHML  
 PAML\_A2 KEKIMPAREALALYGLEPVVLPKEGLGLVNGTAVSASMATLALHDAHML  
 PAML\_A3 KEEIMPAPKALKHGIEPVVLPKEGLGLVNGTAVSASMATLALHDAHML  
 PAML\_A4 KKQIMPAPKALKKHIEPIVLPKEGLGLVNGTAFSASAASLALHDAHML  
 : \* . \* \* \* : \* : : \* \* \* \* \* \* \* \* \* \* \* . \* \* \* \* \* : \* : \* \*

RgPAL SLLAQALTALTVEAMVGHAGSFHPFLHDVTRPHPTQIEVARNIRTLLEGS  
MEGA\_A1 SLLSQALTAMTVEAMVGHAGSFHPFLHDVTRPHPTQIEVARNIRTLLEGS  
MEGA\_A3 ALLSQALTAMTVEAMVGHAGSFHPFIHDVCRPHPGQIEVARNIRTMLEGS  
PAML\_A1 SLLAQALTAMTVEAMVGHAGSFHPFLHDVTRPHPTQIEVARNIRTLLEGS  
PAML\_A2 ALLAQALTAMTVEAMVGHAGSFHPFIHDVTRPHPGQIEVARNIRTLLEGS  
PAML\_A3 ALLSQALTAMTVEAMVGHAGSFHPFIHDVCRPHPGQVEVARNIRTLLEGS  
PAML\_A4 ALLSQVLTAMTVEAMVGHAGSFHPFIHDVCRPHPGQVEVARNIRNMLEGS  
:\*.\*\*\*:\*\*\*\*\*:\*\*\* \*\*\*:\*\*\*\*\*.:\*\*\*

RgPAL KYAVHHETEVEVKVDDEGILRQDRYPLRCSPQWLGPLVSDMIHAHAVLSLE  
MEGA\_A1 KFAVHHEEEVKVDDEGILRQDRYPLRTSPQWLGPLVSDLIHAHAVLSIE  
MEGA\_A3 KFAVHHEEEVKVDEDEGILRQDRYPLRTSPQWIGPLVEDLISAHRAALSIE  
PAML\_A1 KFAVHHEEEVVSQKDDGILRQDRYPLRTSPQWLGPLVSDLIHAHAVLSIE  
PAML\_A2 KFAVHHEEEVVSQKDDGILRQDRYPLRTSPQWLGPLVEDLIIHAHAVLSIE  
PAML\_A3 KFAVHHEEEVRQDEDEGILRQDRYPLRTSPQWIGPLVEDLISAHAAALSIE  
PAML\_A4 KFAVHHEEEVRQDEDEGILRQDRYALRTSPQWIGPQLEDLLSAHKQISVE  
\*:\*\*\*\*\* \*\* .:\*\*\*\*\*.\* \*\*\*:\*\*\*.:\*.:\*.:\*.:\*.:\*.:\*

RgPAL AGQSTTDNPLIDLENKMTTHHGGAFMASSVGNTMEKTRLAVALMGKVSFTQ  
MEGA\_A1 AGQSTTDNPLIDVENKTTTHHGGNFQAASVANTMEKTRLALAQMGKLSFTQ  
MEGA\_A3 LGNSTTDNPLIDVENKTIHHGGNFQAMSVTNAMEKTRLALQQMGKLSFTQ  
PAML\_A1 AGQSTTDNPLIDVENKTTTHHGGNFQAASVANTMEKTRLALAQMGKLSFTQ  
PAML\_A2 AGNSTTDNPLIDVENKTVHHGGNFQAASVSNTMEKTRLALAQMGKLSFTQ  
PAML\_A3 LGNSTTDNPLIDVENKTIHHGGNFQAMSVTNAMEKTRLALQQMGKLSFTQ  
PAML\_A4 LGNSTTDNPLIDVENKTIHHGGNFQAMSVTNAMEKTRLALQHLGKLSFAQ  
\*:\*\*\*\*\*:\*\*\* \*\* \* \* \* \* \*:\*\*\*\*\*: :\*:\*:\*:\*

RgPAL LTEMLNAGMNRALPSCSLAAEDPSLSYHCKGLDIAAAAYTSELGHLANPVS  
MEGA\_A1 LTEMLNAGMNRGLPSCSLAAEDPSLSYHCKGLDIAAAAYTSELGHLANPVT  
MEGA\_A3 MTELVNCSMNRGLPSCSLAAEDPSTSYHCKGLDIAAAAYTSELGFLANPVS  
PAML\_A1 LTEMLNAGMNRGLPSCSLAAEDPSLSYHCKGLDIAAAAYTSELGHLANPVS  
PAML\_A2 LTEMLNASMNRGLPSCSLAAEDPSLSYHCKGLDIAAAAYTSELGYLANPVS  
PAML\_A3 MTELVNCSMNRGLPSCSLAAEDPSTSYHCKGLDIAAAAYTSELGFLANPVS  
PAML\_A4 MTELVNCSMNRGLPSCSLAGDEPSTNYHCKGLDIAAAAYTSELGFLANPVS  
:\*.\*\*\*.\*\*\*\*\*.:\*\* .\*\*\*\*\*.\*\*\*\*\*.\*\*\*\*\*.\*\*\*\*\*:

RgPAL THVQPAEMGNQAINSLALISARRTAEANDVLSLLLATHLYCVLQAVDLRA  
MEGA\_A1 THVQPAEMGNQAVNSLALISARRTAEANDVLSLLLATHLYCVLQAIDLRA  
MEGA\_A3 THVQPAEMSNQAVNSLALISARKTVEANDVLSMLMATHLYCACQALDLRA  
PAML\_A1 THVQPAEMGNQAVNSLALISARRTAEANDVLSLLLATHLYCVLQAVDLRA  
PAML\_A2 THVQPAEMGNQAVNSLALISARRTAEANDVLSLLLATHLYCALQAVDLRA  
PAML\_A3 THVQPAEMSNQAVNSLALISARKTAEANDVLSLLLATHLYCACQALDLRA  
PAML\_A4 THVQSAEMHNQAVNSLALISARKTIEAVEVLSLLMSHLYCACQALDLRA  
\*\*\*.\*\*\* \*\*\*:\*\*\*\*\*:\* \*\* :\*\*\*:\*.\*\*\*.\*\*\*.\*\*\*.\*\*\*.\*\*\*:

RgPAL MEFHTKAFEPMTVELLKQHFGLATAE----VEDKVRKSIYKRLQQNN  
MEGA\_A1 MEFEFKKQFEPMIVELLKQHFGLMTGENL-RELVEKVKKTLWKRLEQNN  
MEGA\_A3 LEFTFRKQFDPMILEMLKQHFGLTSEEL-KELTTKVTKTIWRRLEQTS  
PAML\_A1 MEFEFKKQFEPMIVELLKQHFGLMTAENLRDELVDKVRKSLYKRLQQNN  
PAML\_A2 LEFEFKKQFEPMIVELLTQHFGLTSETLRDELVTKVKKSLYKRLQONS  
PAML\_A3 LEFTFRKQFDPMIVELLTQHFGLTSEA--EDLATKVTKALYKRLQHS  
PAML\_A4 LDLTFRKQLEAMLKELLTTHFGSFLTAEA--EDLSTKVAKALYKRLQHS  
:: . \* :. \* : \* \* . \* \* : \* \* : \* \* \* : \* \* \* : \* \* \* : \* \* .

```

RgPAL      SYDLEQRWHDTF SVATGAVVEALAGQEVSLASLNAWKVACA EKAIALTRS
MEGA_A1    SYDLVPRWHDAFS FATGTVVEALASTE LSLAALNAWKVACA EKAI SLTRQ
MEGA_A3    SMDLVPRWHDAFN HVT SIVVEALSTSENPLPKINQWKKECAEQAVTLTRQ
PAML_A1    SYDLVPRWHDAFS FATGAVVEALASTSLSLAALNAWKVAAA EKAIALTRQ
PAML_A2    SYDLVPRWHDAFS FATGVVVEALASSSLSLAALNQWKVAAA EKAIALTRQ
PAML_A3    SVDLVPRWHDAFS HATGVVVEALASSELSLAALNQWKAAAAEQAVTLTRQ
PAML_A4    SMDLAPRFQDAFK HATGVIVEY LASSATSLASISSWRAAAAEQATKLYRQ
           * * * * : : * : * . * . : * * * : * . * . : * : . * * : * * .

RgPAL      VRDSFWAAPSSSS PALKYLSPRTRVLYS FVREEVGVKARRGDVYLGKQEV
MEGA_A1    VRETFWSAPSTSS PALS YLSPRTRILYS FVREELGVKARRGDVFLGKQEV
MEGA_A3    VRESFWSAPSTSS PAVEYLGPRTKALYS FVREELGVKARRGDVFLGKQEA
PAML_A1    VRETFWSAPSSSS PALS YLSPRTRILYS FVREELGVKARRGDVFLGKQEV
PAML_A2    VRETFWSAPSSSS PALS YLSPRTRILYS FVREELGVKARRGDVFLGKQEA
PAML_A3    VRESFWSAPSSSS PAVEYLGPRTKALYS FVREELGVKARRGDVFLGKQEA
PAML_A4    VRESFFSDPRSSA PAAEYLGPKTKALYEFVRQELGVKARRGDVALGRQEA
           ** : : * : : * : * : * . * * : * : * * * * * * * * * * * * : * : * .

RgPAL      TIGTNVSRIYEAI KSGRIAPVLVKMMA
MEGA_A1    TIGSNVSKIYEAI KSGRINKVLVKMMA
MEGA_A3    TIGSNVSKIYEAI KSGRINKVLVDMMA
PAML_A1    TIGSNVSKIYEAI KSGRINKVLVKMMA
PAML_A2    TIGSNVSKIYEAI KSGRINKVLVDMMA
PAML_A3    TIGSNVSKIYEAI KSGRINKVLVDMMA
PAML_A4    TIGSNVSKIYEAI RSGRLMKVLVDMFA
           *** : *** : * * * * : * * * : * * * . * : *

```

**Supplementary Figure S3: Alignment of RgPAL and all ancestral enzymes.** Grey: alanine-serine-glycine triad that forms catalytic moiety MIO, cyan: all tryptophans.

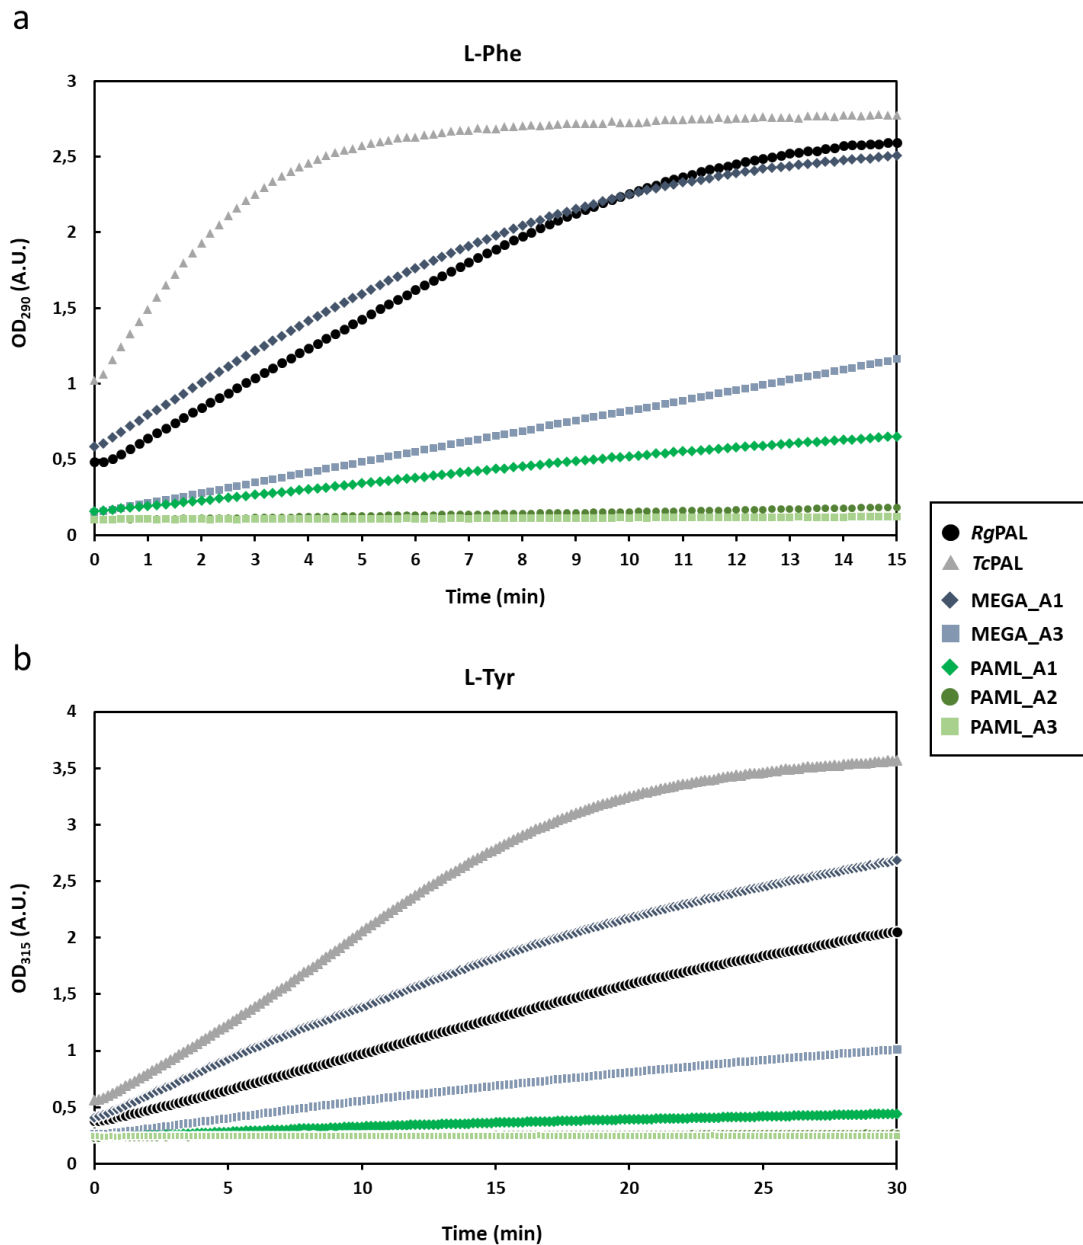

**Supplementary Figure S4: Activity screen of all enzymes.** All screens were performed with 10 mM substrate in a 50 mM Tris-HCl, 125 mM NaCl buffer (pH 8.5) at 37 °C. Enzyme in buffer without substrate was used as a control. **a)** Activity screen with substrate L-Phe. **b)** Activity screen with substrate L-Tyr. The results of these activity screens were only used as an indication of which enzymes to characterize in kinetic studies.

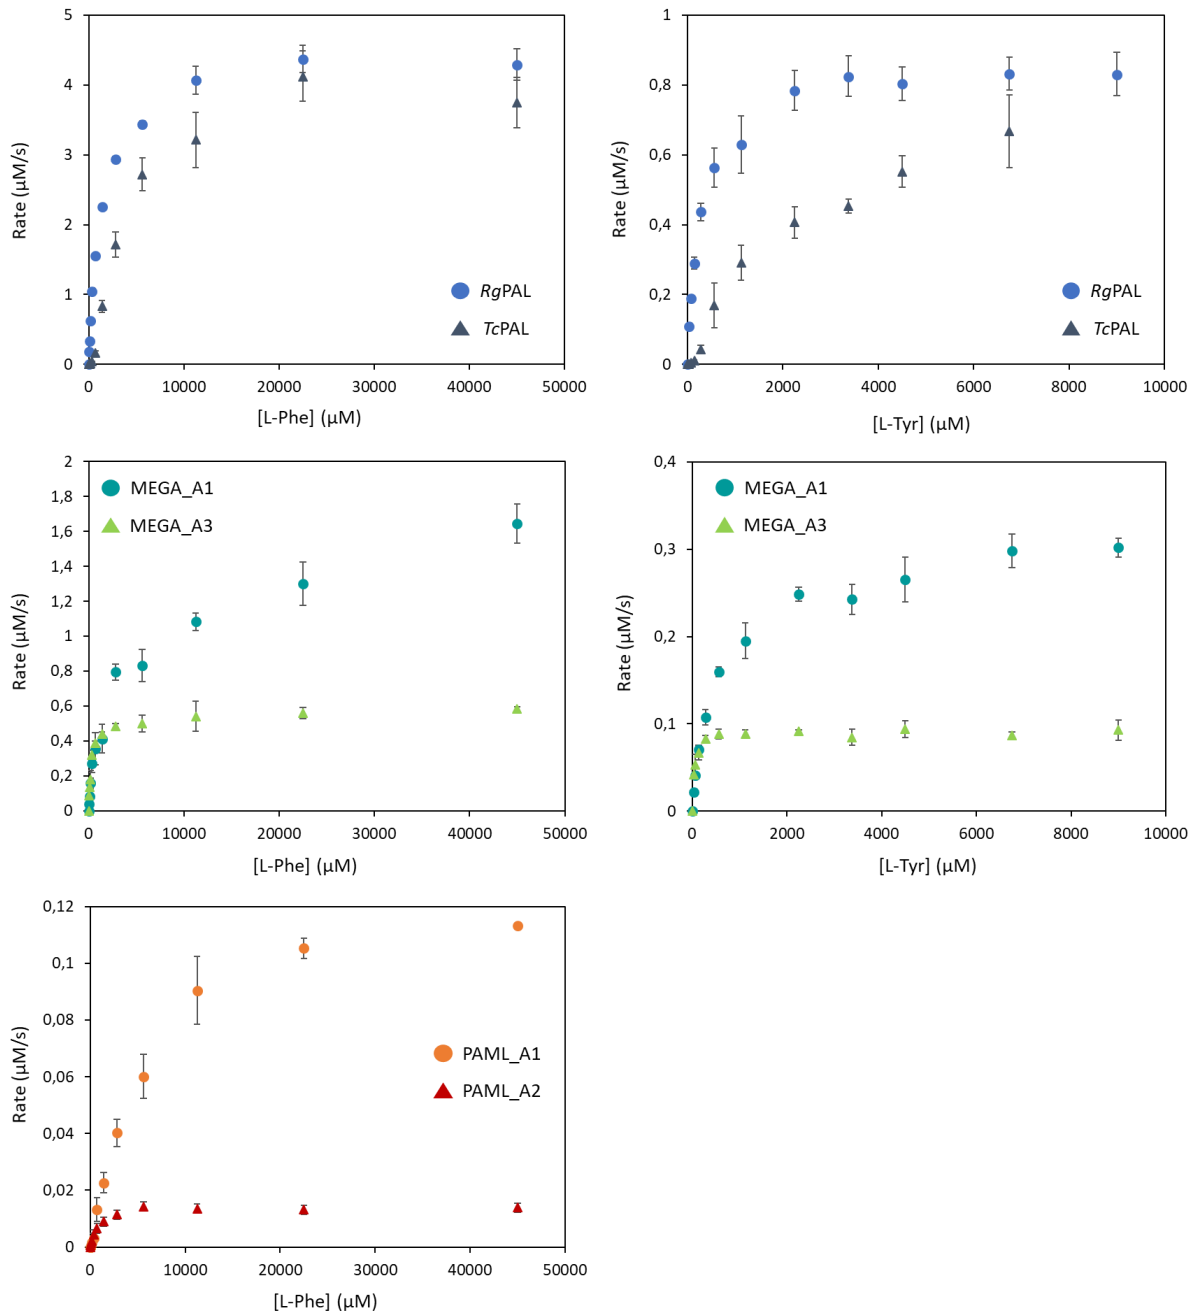

**Supplementary Figure S5: Kinetic analyses of *RgPAL*, *TcPAL* and ancestral PAL/TAL with L-Phe and L-Tyr.** All kinetic assays were performed in a 50 mM Tris-HCl buffer at pH 9.2 in 37 °C. Error bars show standard deviations with  $n=3$ .



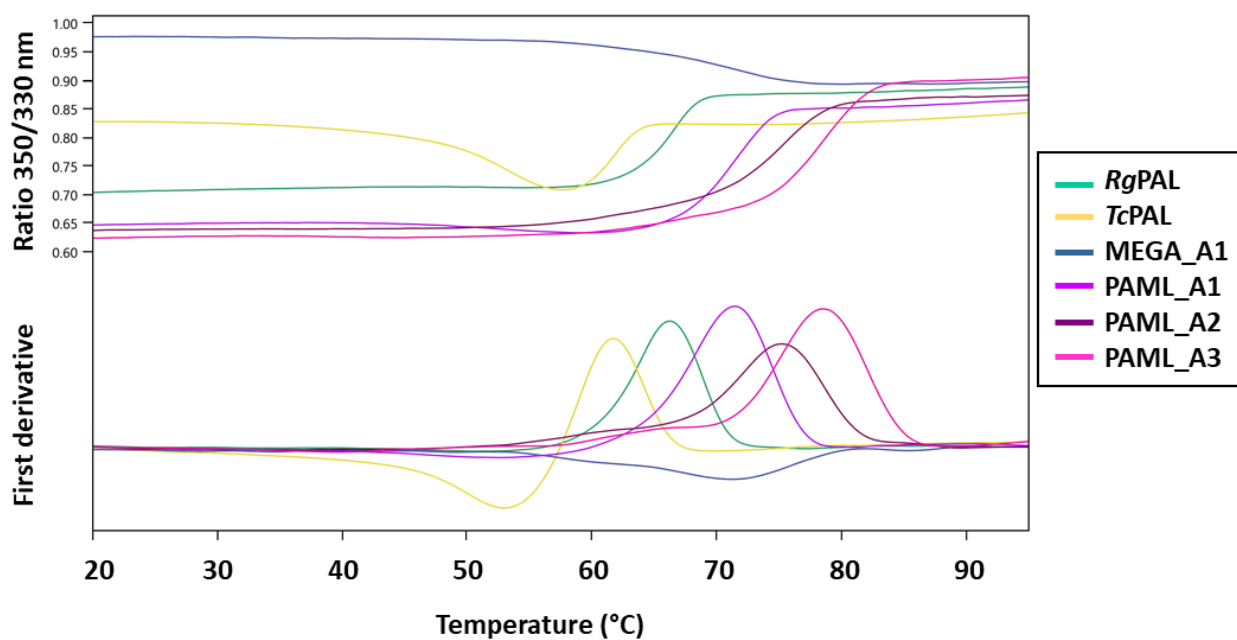

**Supplementary Figure S6: Melting curves established by nanoDSF.** The ratio of intrinsic tryptophan fluorescence at 350 over 330 nm was monitored while heating the samples with 1 degree per minute from 20 °C to 90 °C (top part of figure). The melting temperature is determined as the maximum of the first derivative of the ratio (bottom part of figure).

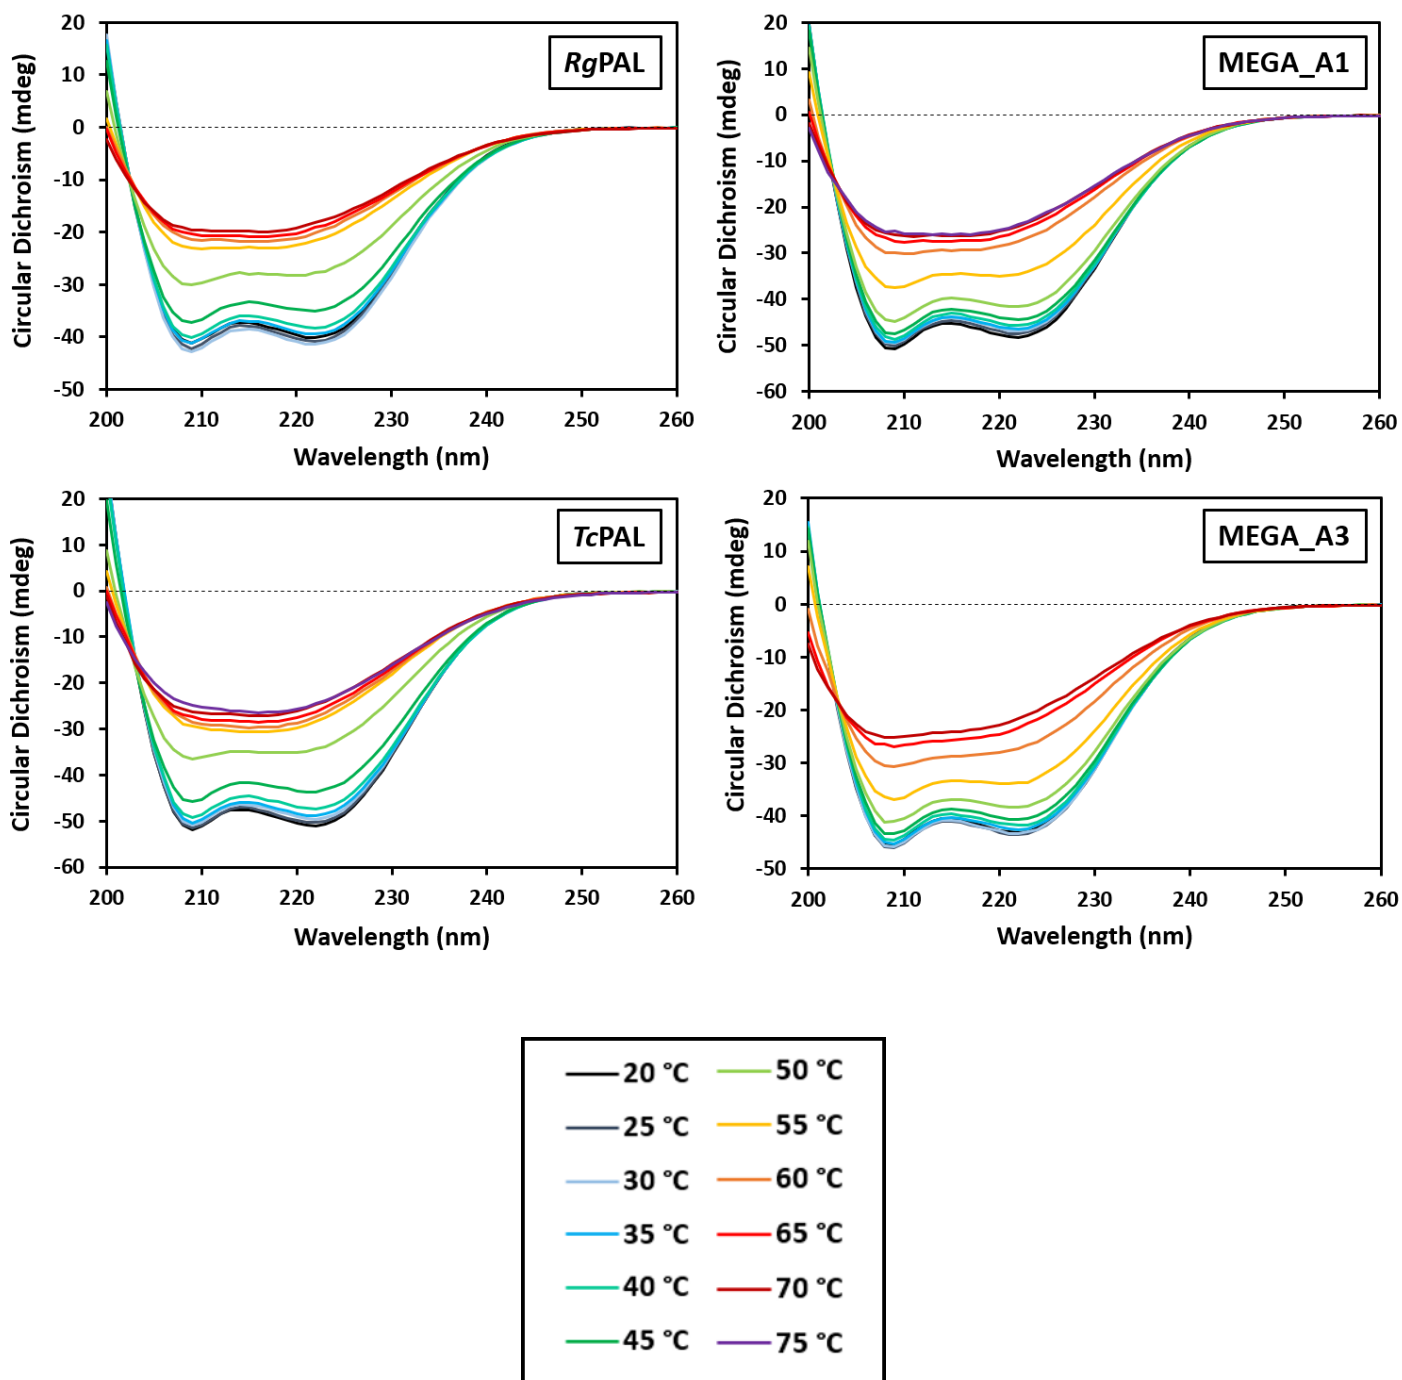

**Supplementary Figure S7: Analysis of thermostability for *RgPAL*, *TcPAL*, MEGA\_A1 and MEGA\_A3 by circular dichroism spectroscopy.** CD spectra were measured from 200-260 nm at one-degree intervals from 20-90 °C. Spectra are shown for every five-degree interval from 20-75 °C, since no additional changes were observed at higher temperatures and due to spectral overlap.

a

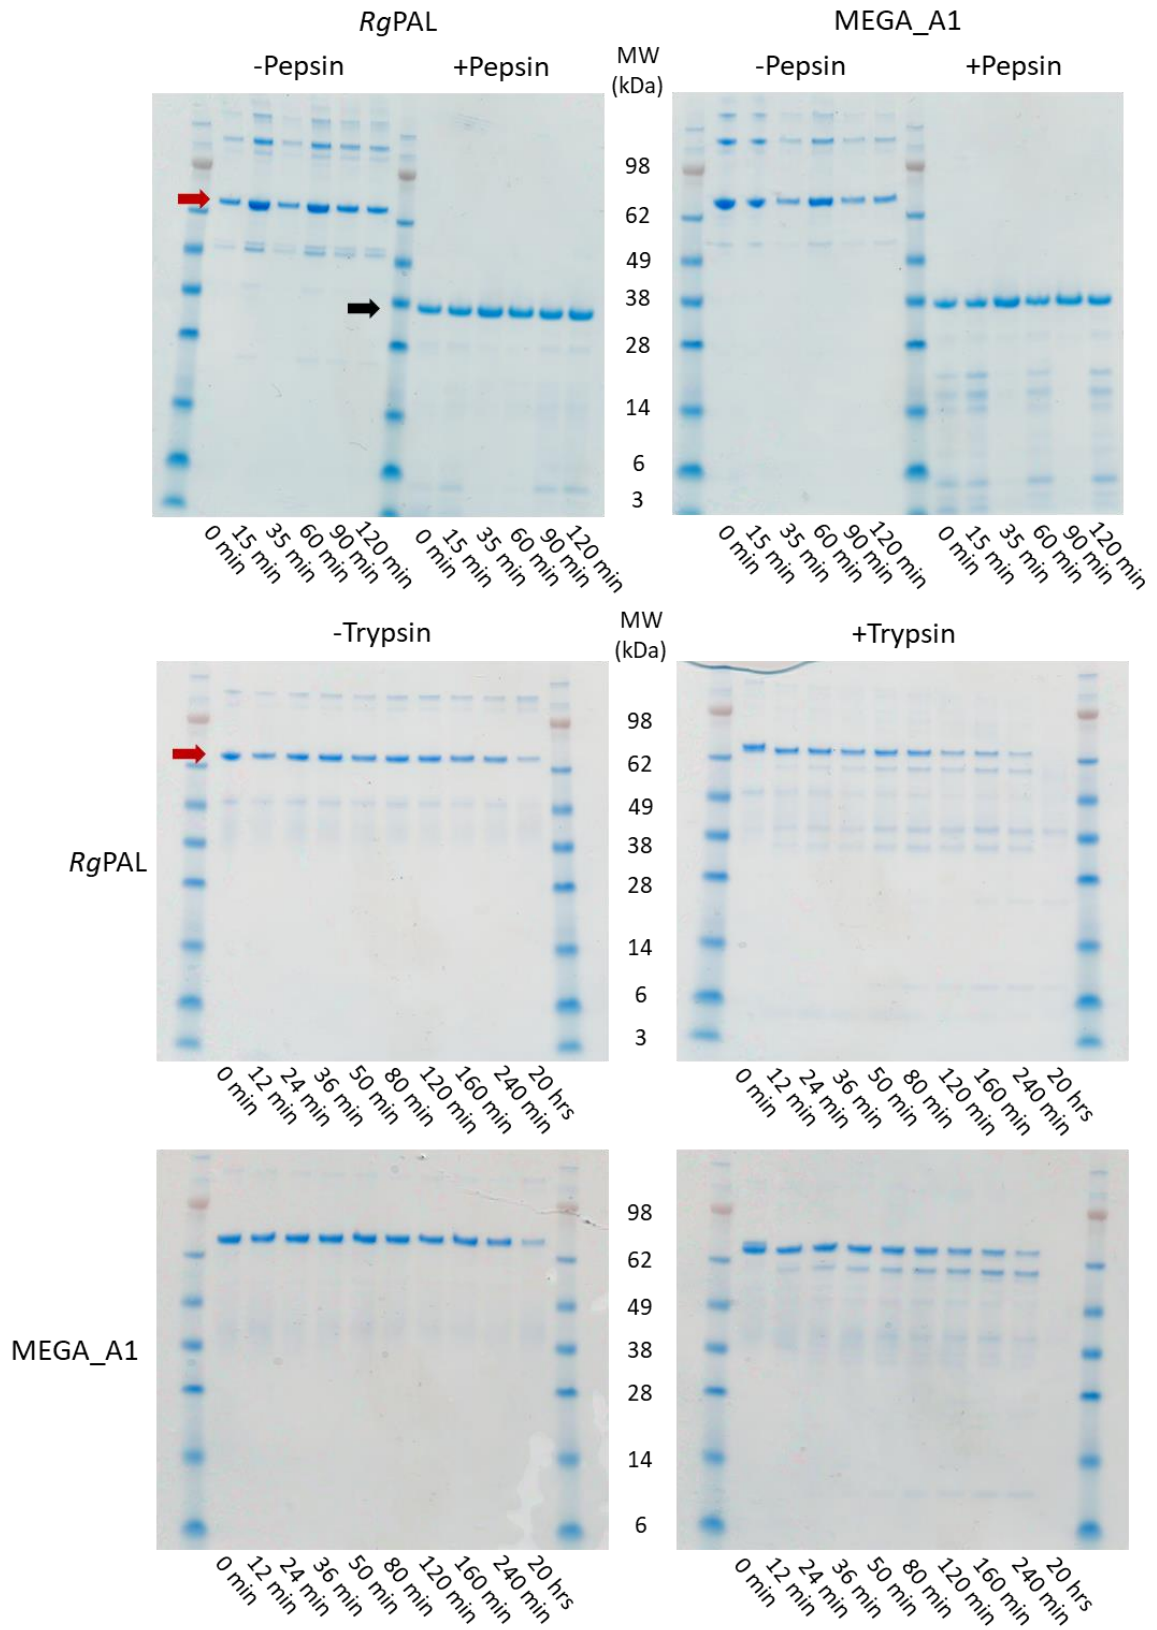

b

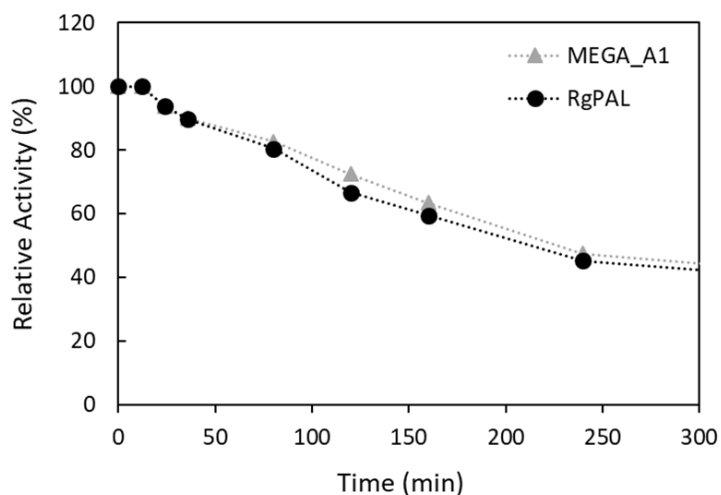

**Supplementary Figure S8: Proteolytic stability. a)** SDS-PAGE analysis of samples over time in samples +/- pepsin (top) and +/- trypsin (bottom). The band that represents PAL/TAL is indicated with a red arrow and disappeared completely in all pepsin samples. Pepsin is indicated by a black arrow. In samples with trypsin the PAL/TAL band becomes fainter over time, whereas other smaller bands appear (most likely degradation products). Due to the lower concentration of trypsin and a lower amount of protein loaded onto the gel, it is not visible on SDS-PAGE. All six gel images were cropped around the edges for display. The SeeBlue Plus2 pre-stained molecular weight marker is shown in all gels, however, the lowest band is missing from the MEGA\_A1 trypsin gels because the program was run too long. Differences in band intensities for the +/- pepsin samples are likely due to inconsistent sampling (quantification of activity loss was based on kinetic measurements, see below). **b)** Activity analysis of RgPAL and MEGA\_A1 samples with trypsin over time, using L-Tyr as a substrate. Activity was lost completely after 20 hours. The sample taken after 50 minutes was only analyzed on SDS-PAGE because the temperature in the sample had not been adjusted to 37 °C for activity measurements and could not be included.

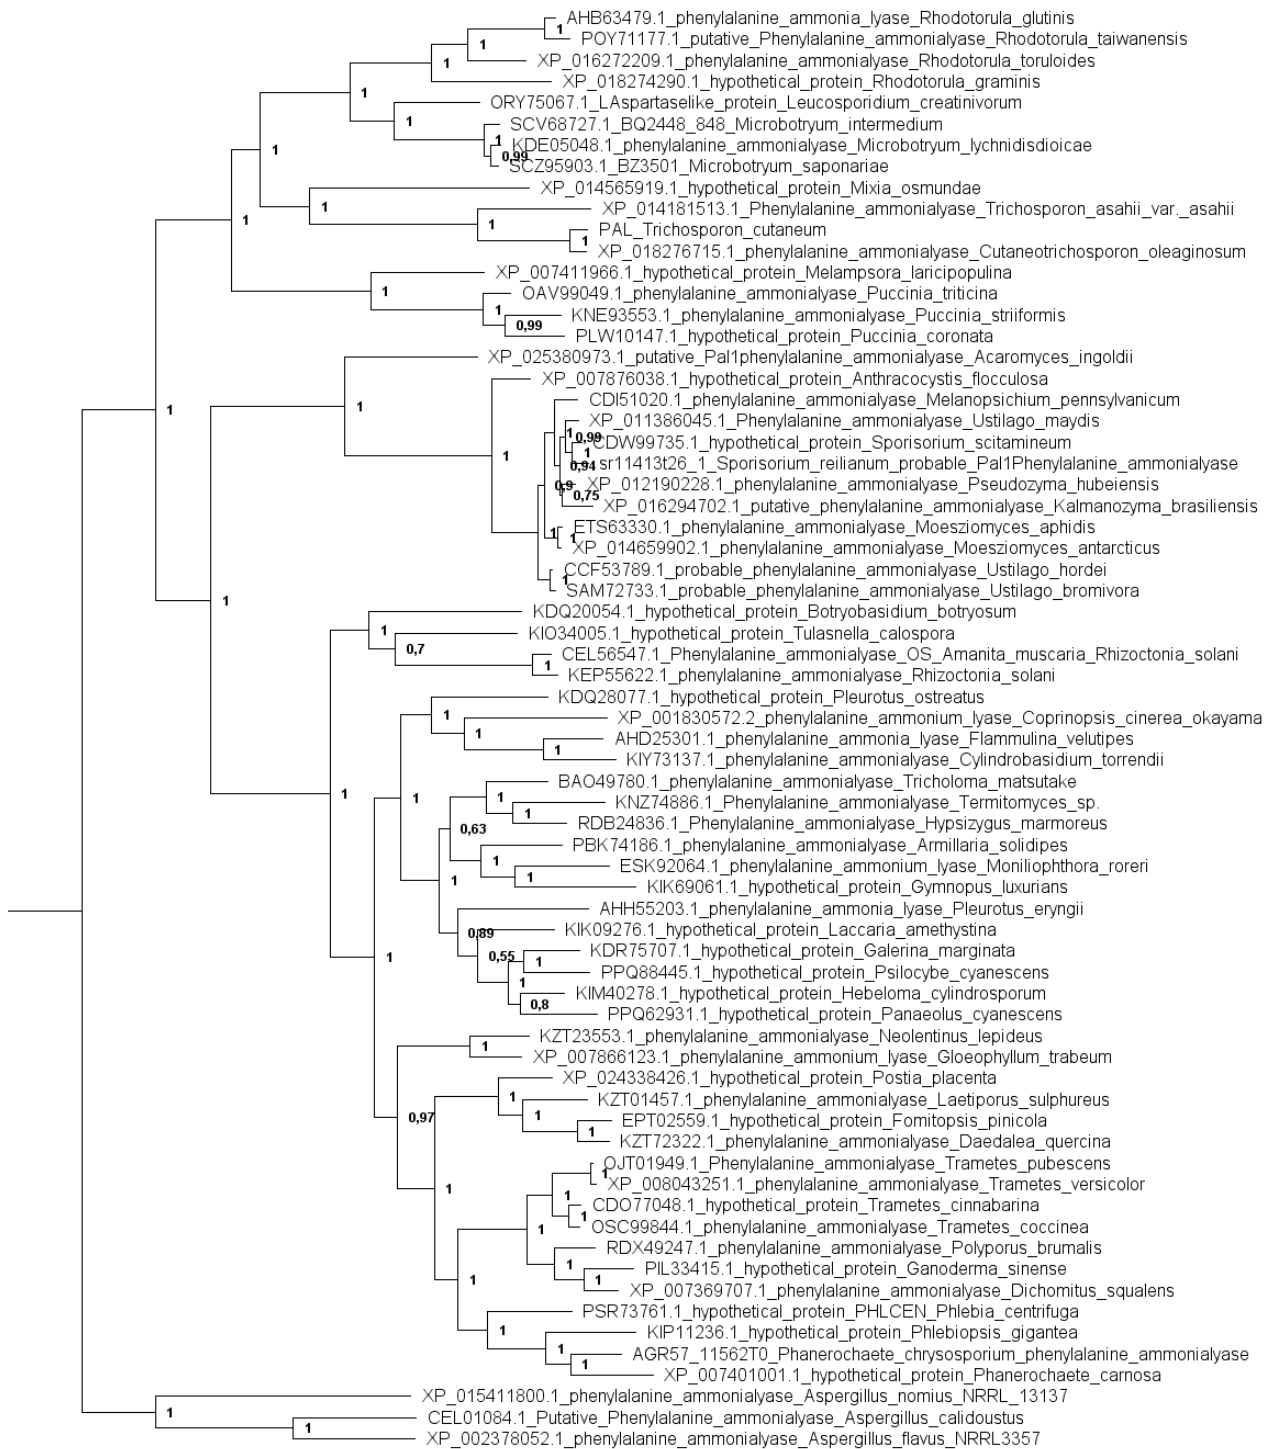

0.02

**Supplementary Figure S9: Consensus tree from three chains in BALi-Phy.** Three independent Markov Chain Monte Carlo chains were run in BALi-Phy<sup>2</sup> version 3.3 with the same set of sequences used to construct the Maximum Likelihood (ML) tree, yet in full length. Only two minor differences occur with respect to the ML tree - all within the clade of Agaricomycotina. The part in which the ancestors were reconstructed has high posterior probabilities.

## REFERENCES

1. Scott, R. C. The genetic tyrosinemias. *Am. J. Med. Genet.* **142C**, 121–126 (2006).
2. Suchard, M. A. & Redelings, B. D. BAli-Phy: Simultaneous Bayesian inference of alignment and phylogeny. *Bioinformatics* **22**, 2047-2048 (2006).
